# Supplementary material for: The brain-specific kinase LMTK3 regulates neuronal excitability by decreasing KCC2-dependent neuronal Cl− extrusion
Source: PubMed Central journal article supplement — iScience. 2024 Mar 15;27(4):109512. doi: 10.1016/j.isci.2024.109512 (PMC11075064; doi:10.1016/j.isci.2024.109512), 2024-03-15
Supplement: mmc1.pdf [file mmc1.pdf]

**Supplemental information**

**The brain-specific kinase LMTK3 regulates  
neuronal excitability by decreasing  
KCC2-dependent neuronal Cl<sup>-</sup> extrusion**

**Noell Cho, Georgina Kontou, Joshua L. Smalley, Christopher Bope, Jacob Dengler, Kristopher Montrose, Tarek Z. Deeb, Nicholas J. Brandon, Tadashi Yamamoto, Paul A. Davies, Georgios Giamas, and Stephen J. Moss**

**Figure S1. LMTK3 and KCC2 co-purify when expressed in HEK-293 cells, Related to Figure 1.**

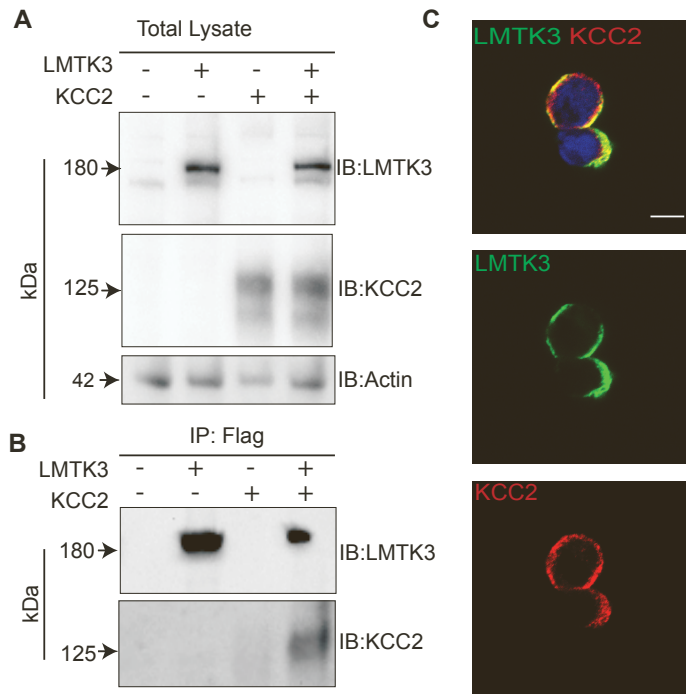

**A.** HEK cell lysates were subjected resolved on SDS-PAGE and immunoblotted for LMTK3 and KCC2 (input). **B.** LMTK3 was isolated from the lysates by immunoprecipitation (IP), resolved on SDS-PAGE and immunoblotted for LMTK3 and KCC2, confirming their co-immunoprecipitation. **C.** Confocal images of HEK cells expressing LMTK3 and KCC2, stained with DAPI and immuno-stained using an anti-flag and an anti-KCC2 antibody. Scale Bar = 10  $\mu$ m.

Figure S2. Examining the subcellular distribution of KCC2 in the dentate gyrus of WT and LMTK3-KO mice, related to Figure 3.

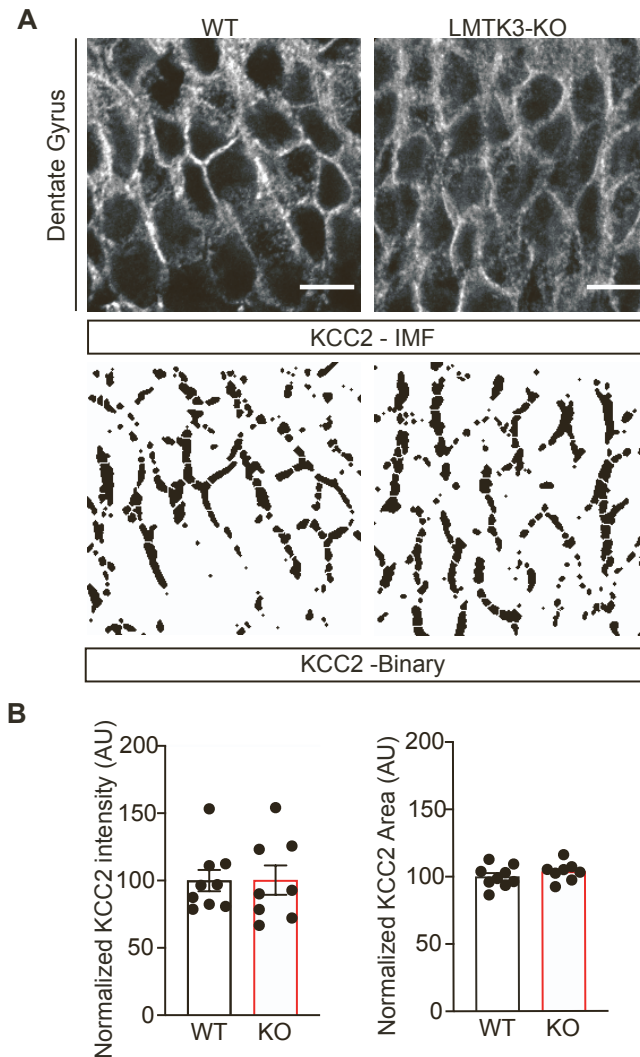

**A.** In the upper panel representative confocal images are shown of dentate gyrus of the stratum dentate gyrus granule cell layer from WT and LMTK3-KO mice stained with KCC2 antibody, scale bar = 10  $\mu$ m. The raw images were analyzed via ImageJ and this data was used to create background subtracted binary distribution of KCC2 expression that are shown in the lower panels. **B.** Image J was used to compare the intensity and area of KCC2 puncta between genotypes, n=12 images from 3 mice/genotype.

**Figure S3. Examining the effects of C28 on  $E_{GABA}$  in cultured neurons using gramicidin-perforated patch clamp recording, related to figure 5.**

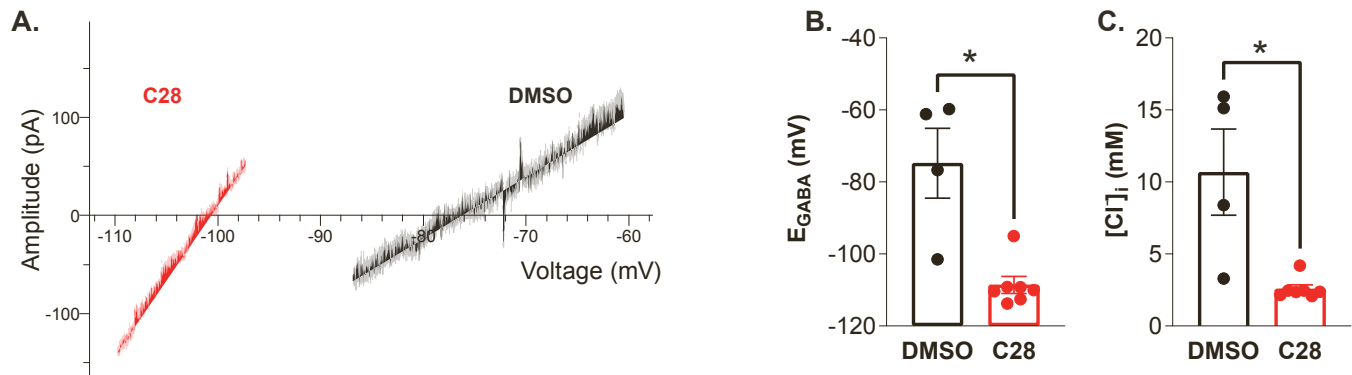

**A.** Representative I-V traces are shown for the polarity of currents induced by rapid application of muscimol in 18-22 Div neurons as measured using perforated patch-clamp recording following 1h exposure to V or 10  $\mu$ M C28. The recordings were used to determine  $E_{GABA}$  and  $[Cl^-]_i$  which were then compared between treatments as shown in **B** and **C** respectively. \*=  $p < 0.01$ , t-test,  $n=4-6$  cells, in all panels data represent mean  $\pm$  SEM.

**Table S1** Proteins recovery with LMTK3 as measured using LC-MS/MS

**Table S2** Proteins recovered with KCC2 as measured using LC-MS/MS
